# Supplementary material
Source: PubMed Central journal article supplement (PMC6404570)
Supplement: fj.201801628R.st1.pdf [file fj.201801628R.st1.pdf]

**Table S1: Flux studies**

| Compound | K <sup>+</sup> Fluxed (%) | Glutamate Fluxed (%) |
|----------|---------------------------|----------------------|
| 011      | 17*                       | ND                   |
| 011A     | 26**                      | 14*                  |
| 120      | 31**                      | ND                   |

\* P<0.05; \*\* p<0.01; ND not detectable

**Methods:****Steady State Glutamate.**

The MJF612 strain was used carrying either the pb10d empty vector or expressing WT Eco-MscL in the same pb10d vector. Overnight cultures were inoculated from a single colony in K10 media. The next day cultures were diluted 1:100 in the same K10 media and expression was induced with 1 mM IPTG for 1 hour after an OD<sub>600</sub> of 0.2 was reached. The cultures were then split in two; mock (DMSO only) or treated with compounds 120 at 5 μm, 011 or 011A at 40 μm with a final DMSO concentration of 0.9% for all samples. Cultures were grown overnight for 17 hours in a 37°C shaker when the final OD<sub>600</sub> was recorded. For each sample 6 ml was pelleted. Pellets were brought up in the same media adjusting volume for OD and sonicated for 1 min. Glutamate measurements were performed using the EnzyChrom Glutamate Assay Kit (BioAssay Systems, Hayward, CA, US) per the manufacturer's instructions. Viability assays were done in conjunction n = 3.

**Steady State K<sup>+</sup>.**

The MJF612 strain was used for the K<sup>+</sup> steady state experiments carrying either the pb10d empty vector or expressing WT Eco-MscL in the same pb10d vector. Overnight cultures grown in K10 media from a single colony were diluted 1:25 into the same media, grown to an OD<sub>600</sub> of 0.2, when expression was induced with 1 mM IPTG for 1 hour. Cultures were then split into; mock (DMSO only), or treated with one of the three compounds 120 at 5 μm, 011 at 40 μm or 011A at 40 μm, with a final DMSO concentration of 0.9%. Cultures were then grown for 17 hours in a 37°C shaker. Final OD<sub>600</sub> was then recorded and the amount of cells to be used was adjusted for OD. Typical OD<sub>600</sub> values ranged from 1.0 to 1.3 and approximately 950 μl-1.2 ml of the cultures were passed through a 0.45-μm filter and washed with K0 media (K10 with the KCL replaced by NaCl) having the same osmolality, without ampicillin or supplements. Filters were placed in a plastic beaker, covered with foil and dried in an 80°C oven overnight. The next day 3 ml of double distilled water was added to each beaker and K<sup>+</sup> was measured using a Jenway flame photometer (Cole-Palmer, East Norwalk, CT) n = 3.

**Table S2:** Binding free energies between MscL and 011A, all energies in kcal/mol

| E <sub>vdw</sub> | E <sub>EEL</sub> | $\Delta G_{pol}^{PB}$ | $\Delta G_{nonpolar}^{SAS}$ | TΔs           | ΔG <sub>Binding</sub> |
|------------------|------------------|-----------------------|-----------------------------|---------------|-----------------------|
| -30.59 ± 0.26    | -4.61 ± 0.35     | 9.21 ± 1.02           | -2.18 ± 0.00                | -17.85 ± 0.03 | -10.32                |
